# Supplementary material
Source: PubMed Central journal article supplement (PMC2714433)
Supplement: supp_122_4_489__1.pdf [file supp_122_4_489__1.pdf]

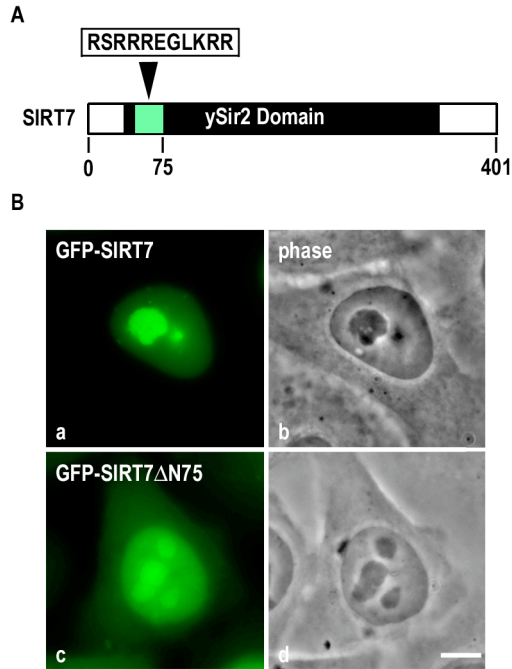

**Figure S1.** SIRT7 presents a nucleolar localization sequence. (A) SIRT7 presents an arginine-rich region (green box: RSRREGLKRR) within its 75 first amino acids. (B) GFP-SIRT7 construct (a, b) and GFP-SIRT7 construct deleted from the 75 first amino acids (c, d) were transfected in HeLa cells. Bar, 10  $\mu$ m.
