# Supplementary material
Source: PubMed Central journal article supplement (PMC2714433)
Supplement: supp_122_4_489__2.pdf [file supp_122_4_489__2.pdf]

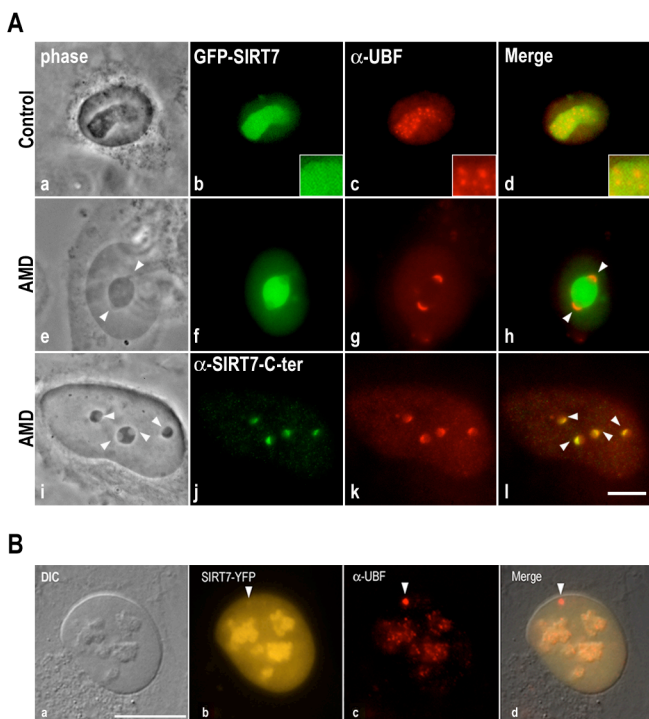

**Figure S2.** Exogenously expressed SIRT7 is mislocalized. (A) Immunodetection of UBF was performed in HeLa cells stably expressing GFP-SIRT7 in the absence (a-d) or presence (e-h) of AMD (0.1  $\mu$ g/ml for 2 hours). Immunodetection of endogenous SIRT7 and UBF was performed in AMD-treated HeLa cells (i-m). UBF-containing caps are indicated by arrowheads. (B) Exogenous SIRT7 was visualised in 3D-1 cells transfected with SIRT7-YFP and endogenous UBF was visualised by antibody staining (a-d). Red and green labelings were merged (h). Pseudo-NORs are identified by arrowheads. Bar, 10  $\mu$ m.
